# Supplementary material for: Methionine-assisted electrodeposition of porous copper cobalt bi-metallic hetero-nanostructures on an indium tin oxide electrode: a disposable and stable electrode for non-enzymatic glucose sensing
Source: Royal Society of Chemistry journal article supplement (doi:10.1039/d4tc00079j), 2024-01-01
Supplement: d4tc00079j1.pdf [file d4tc00079j1.pdf]

## Methionine assisted electrodeposition of porous copper cobalt bi-metallic hetero-nanostructures on an indium tin oxide electrode: a disposable and stable electrode for non-enzymatic glucose sensing

Perumal Viswanathan <sup>a</sup>, Ji Won Kim <sup>a</sup>, Shanmugam Manivannan <sup>b</sup> and Kyuwon Kim <sup>\*a</sup>

<sup>a</sup> Electrochemistry Laboratory for Sensors & Energy (ELSE),  
Research Institute of Basic Sciences, Incheon National University,  
Incheon 22012, Republic of Korea.

<sup>b</sup> Nanomaterials and Electrochemistry Laboratory (NEL), Department of Chemistry,  
Institute of Science, Banaras Hindu University, Varanasi 221005, U.P., India

\*E-mail: [kyuwon\\_kim@inu.ac.kr](mailto:kyuwon_kim@inu.ac.kr)

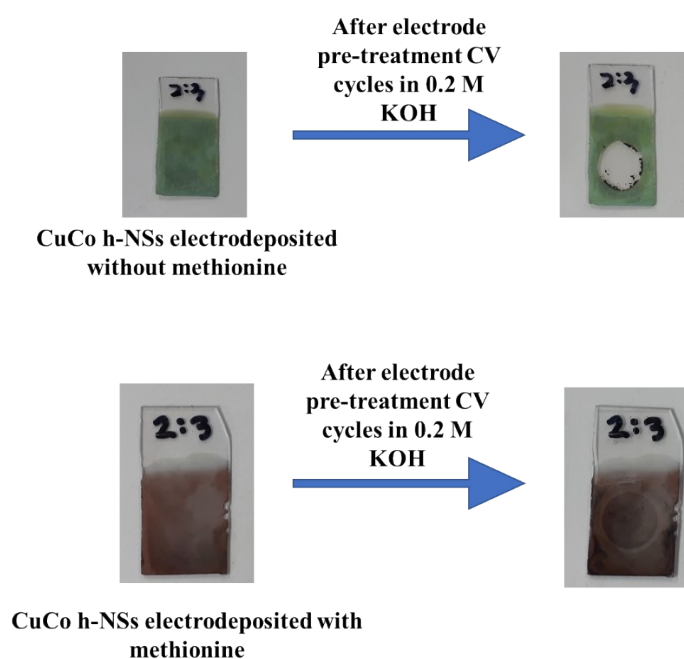

**Fig. S1** Digital photographs of CuCo h-NSs films electrodeposited on ITO electrodes in the presence and absence of methionine and their stability after electrode pre-treatment.

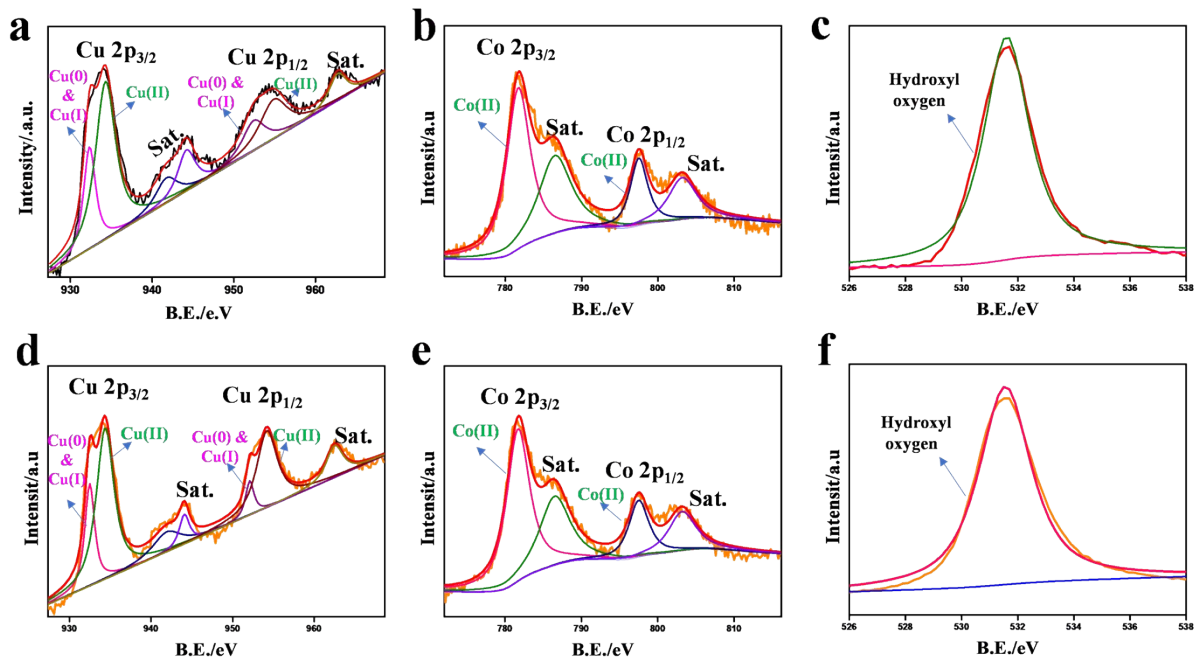

**Fig. S2** XPS core-level spectra of Cu, Co and O of CuCo films electrodeposited for 15 min (a-c) and for 60 min (d-f) in the presence of methionine.

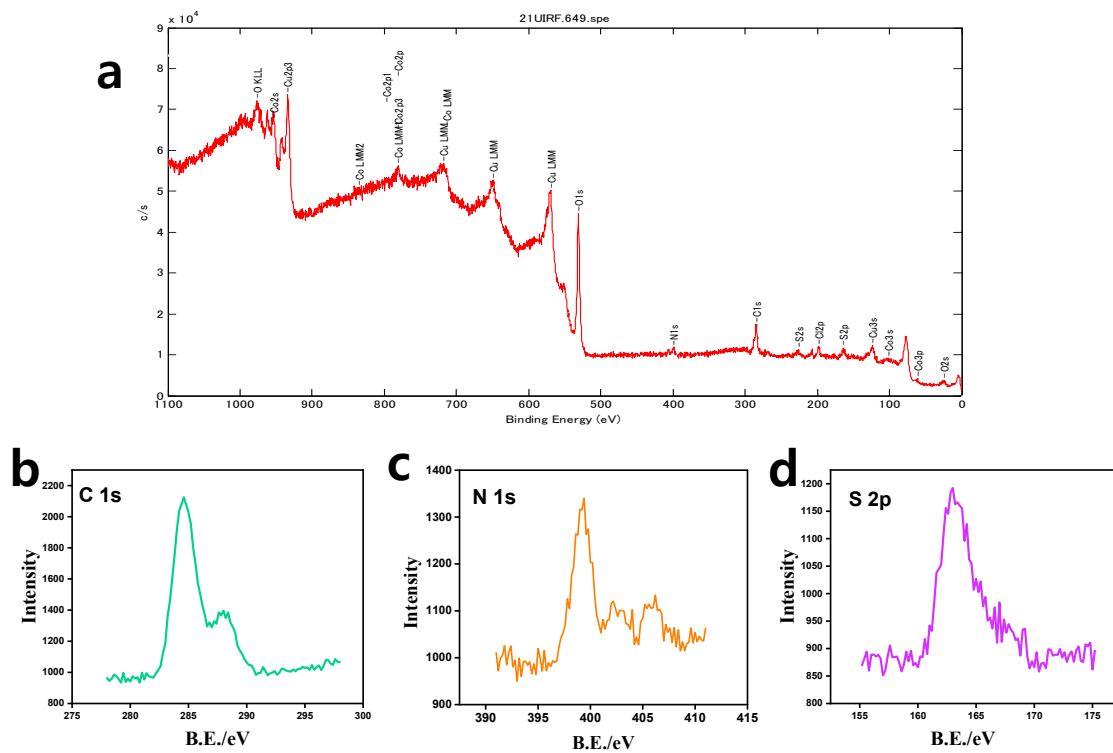

**Fig. S3** XPS spectra of CuCo h-NSs electrodeposited in the presence of methionine for 30 min; survey (a), core-level spectrum of C 1s (b), N 1s (c) and S 2p (d).

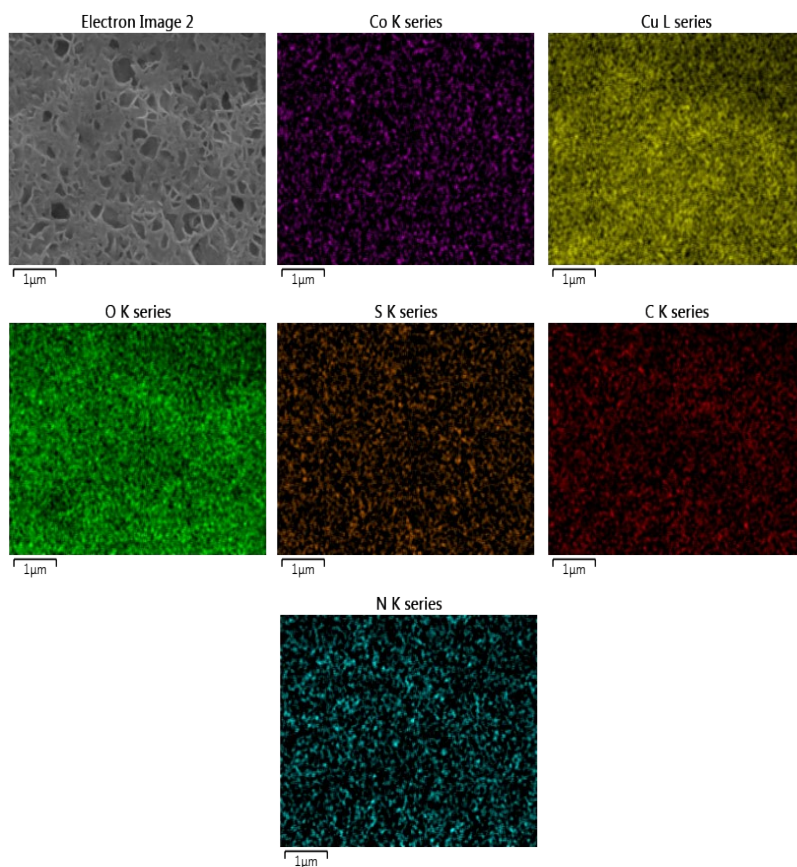

**Fig. S4** FE-SEM images of CuCo h-NSs electrodeposited in the presence of methionine for 30 min and their elemental mapping analyses.

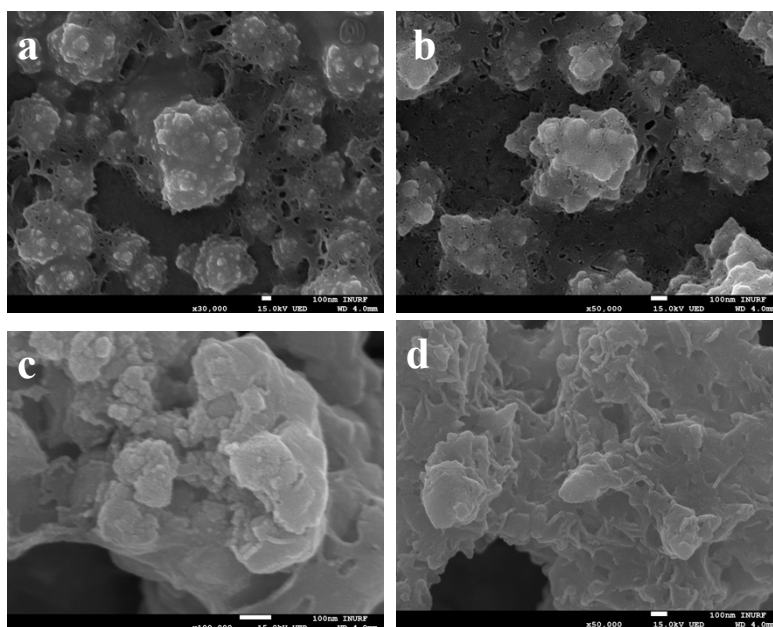

**Fig. S5** FE-SEM images of CuCo h-NSs electrodeposited in the presence of methionine for 15 min (a-b) and 60 (c-d) min.

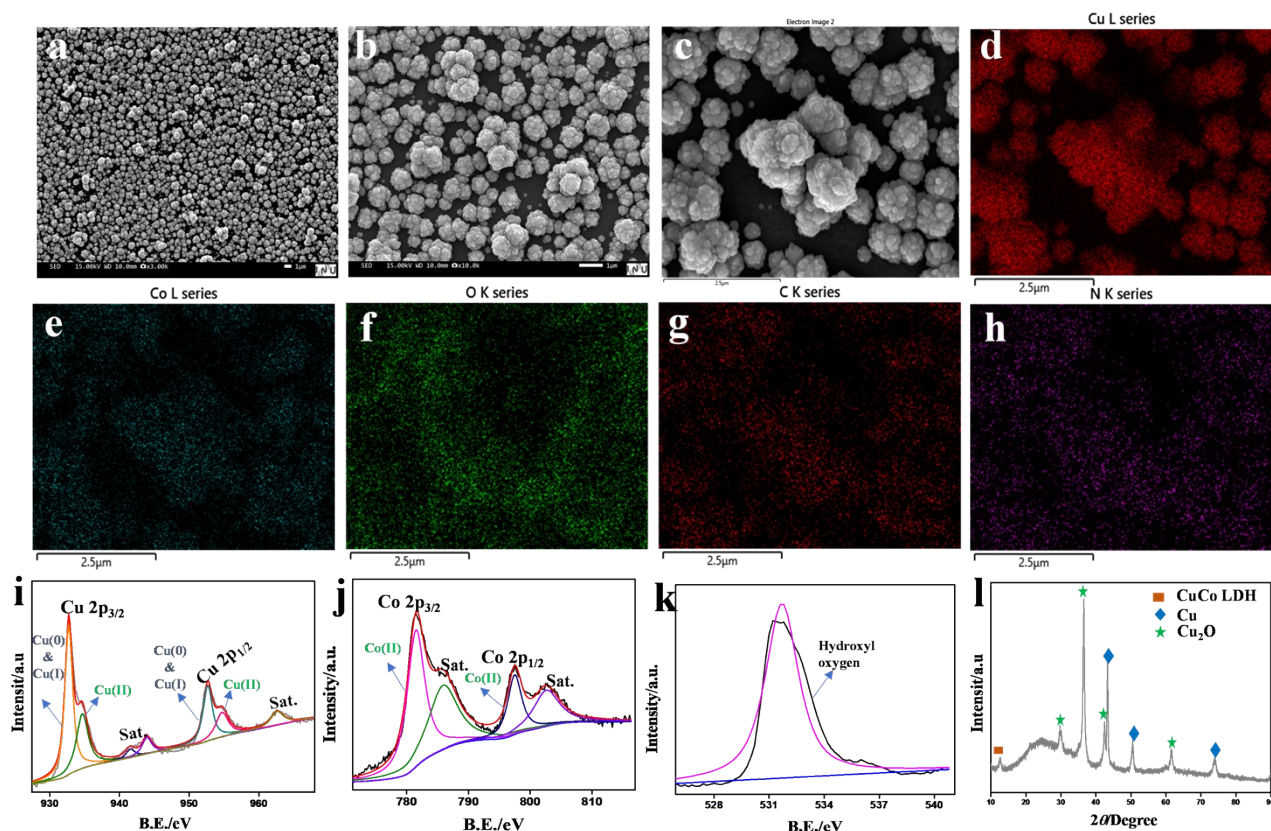

**Fig. S6** FE-SEM images (a-c), elemental mapping analyses (d-h), core-level XPS spectra of Cu 2p (i), Co 2p (j), O 1s (k) and XRD data (l) of CuCo h-NSs electrodeposited for 30 min in the presence of glutamine.

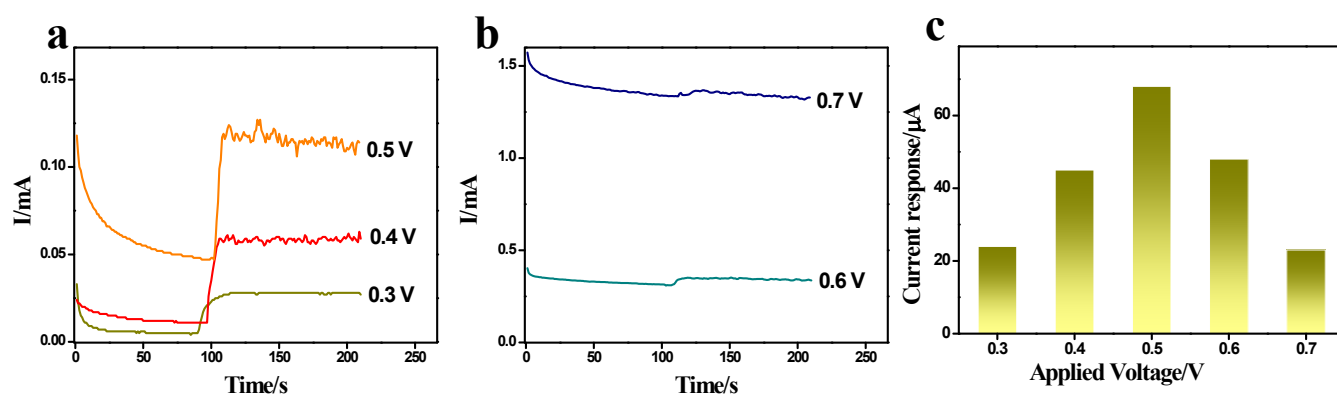

**Fig. S7** Amperometry i-t curve recorded for the addition of 50  $\mu$ M glucose at various applied potentials of 0.3 to 0.5 (a), 0.6 to 0.7 (b) and their corresponding current response bar diagram against applied voltage (c).

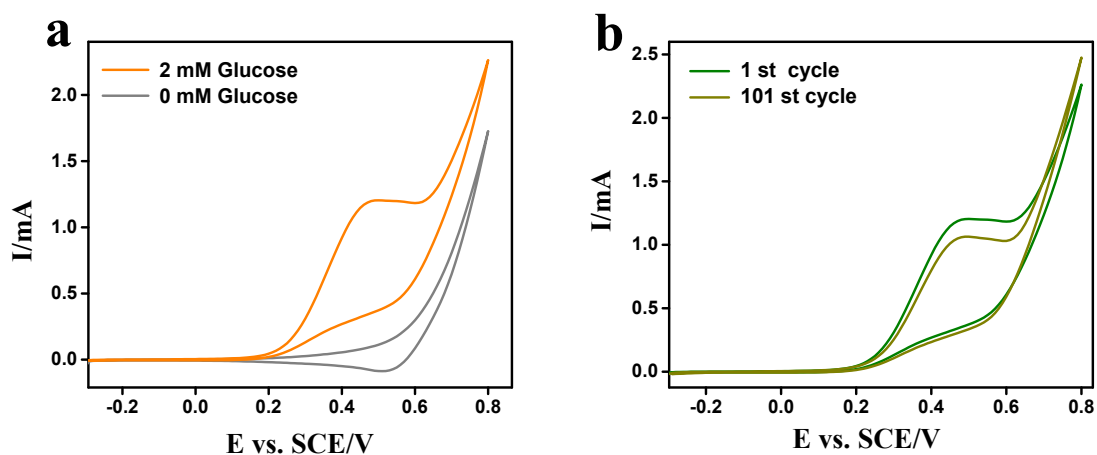

**Fig. S8** (a) CVs recorded in the presence and absence of 2 mM glucose at CuCo h-NSs electrodeposited in the presence of glutamine for 30 min in 0.2 M KOH, (b) comparison of CVs recorded before and after 100 cycles of stability test (Scan rate = 50 mV/s).

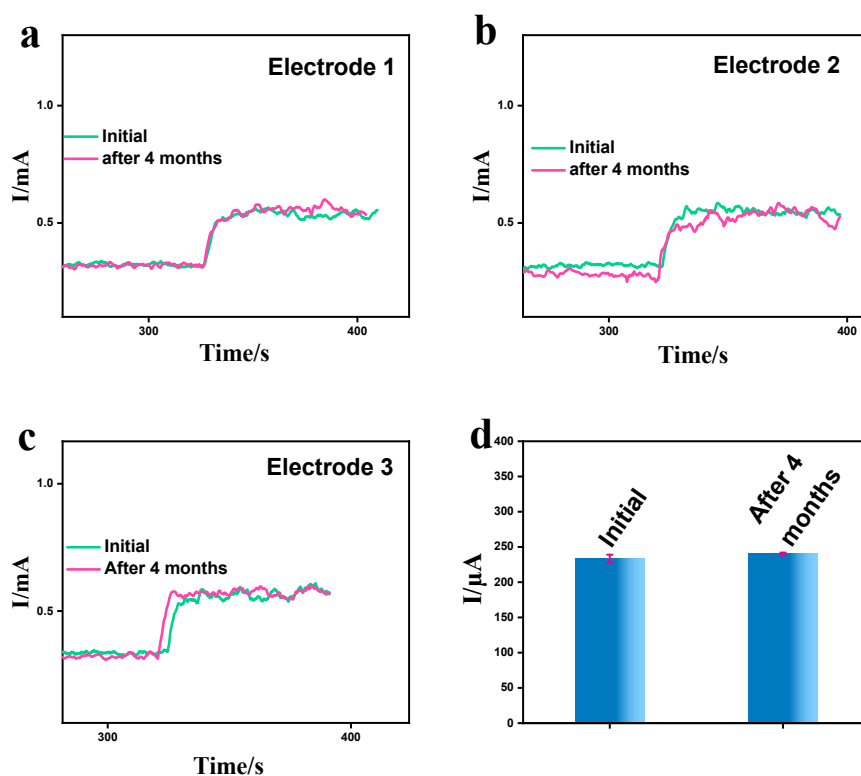

**Fig. S9** Long-term storage test carried out at three different CuCo h-NSs electrodeposited in the presence of methionine for 30 min (a-c) and the corresponding bar diagram compare the current responses at initial and after four months (d).

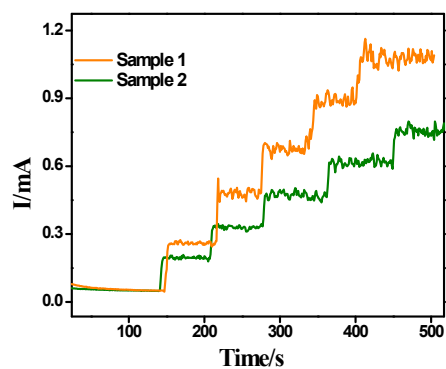

**Fig. S10** Amperometry i-t curve obtained for the quantification of glucose concentration in the glucose spiked orange juice samples.

**Table S1.** Determination of glucose concentration in the glucose spiked orange juice samples.

| Juice sample | Original glucose concentration in juice ( $\mu\text{M}$ ) | Spiked glucose concentration ( $\mu\text{M}$ ) | Measured glucose concentration | Recovery (%) | RSD (%) (n=4) |
|--------------|-----------------------------------------------------------|------------------------------------------------|--------------------------------|--------------|---------------|
| Sample 1     | 50                                                        | 100                                            | 160                            | 106          | 3.2           |
| Sample 2     | 50                                                        | 50                                             | 103                            | 103          | 1.08          |
